# Supplementary material for: Pembrolizumab in combination with LEnvatinib in participants with hepatocellular carcinoma before liver transplant as Neoadjuvant TherapY—PLENTY pilot study
Source: PubMed Central journal article supplement — Int J Surg. 2024 Jul 12;110(10):6647–57. doi: 10.1097/JS9.0000000000001813 (PMC11487031; doi:10.1097/js9.0000000000001813), 2024-07-12

**Supplementary Figure 1:** Representative images and pathological specimens of patients with observed necrosis.

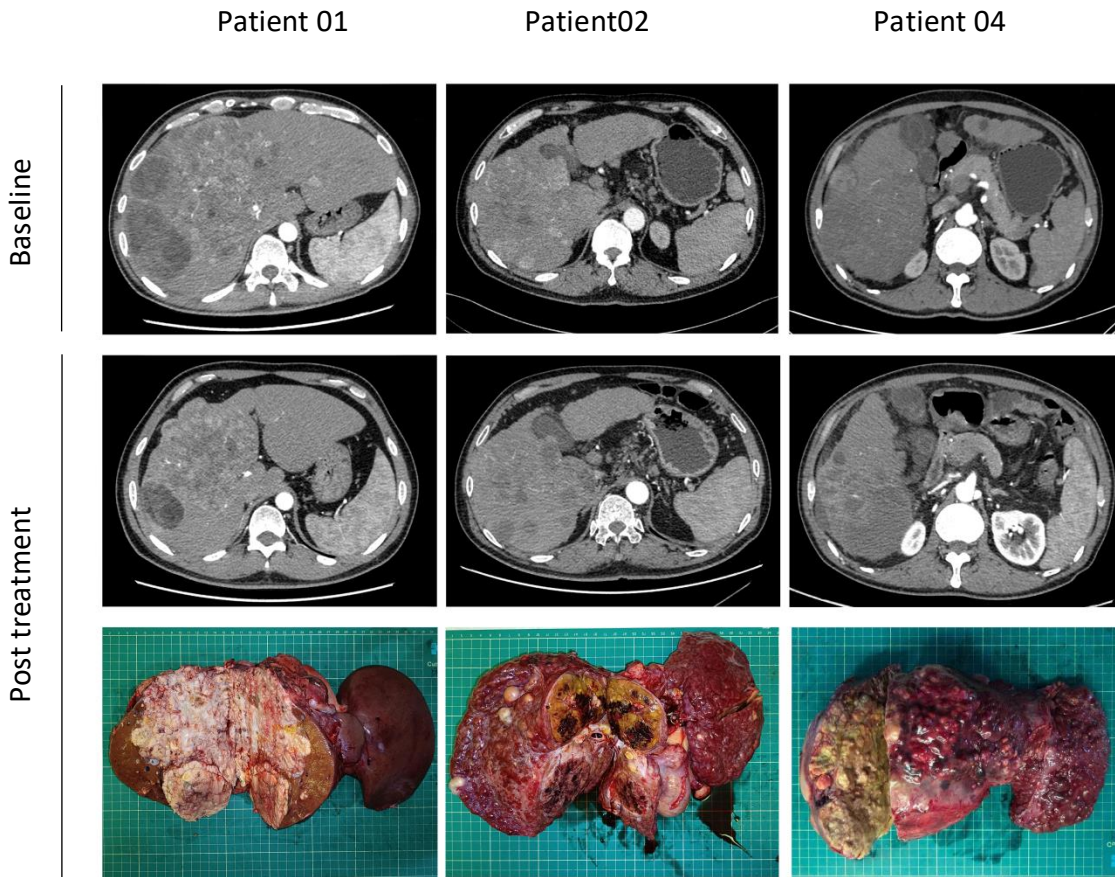

## Supplementary Figure 2: Changes of biomarkers, cytokines, and lymphocyte subsets in peripheral blood for patients with different tumor necrosis rates

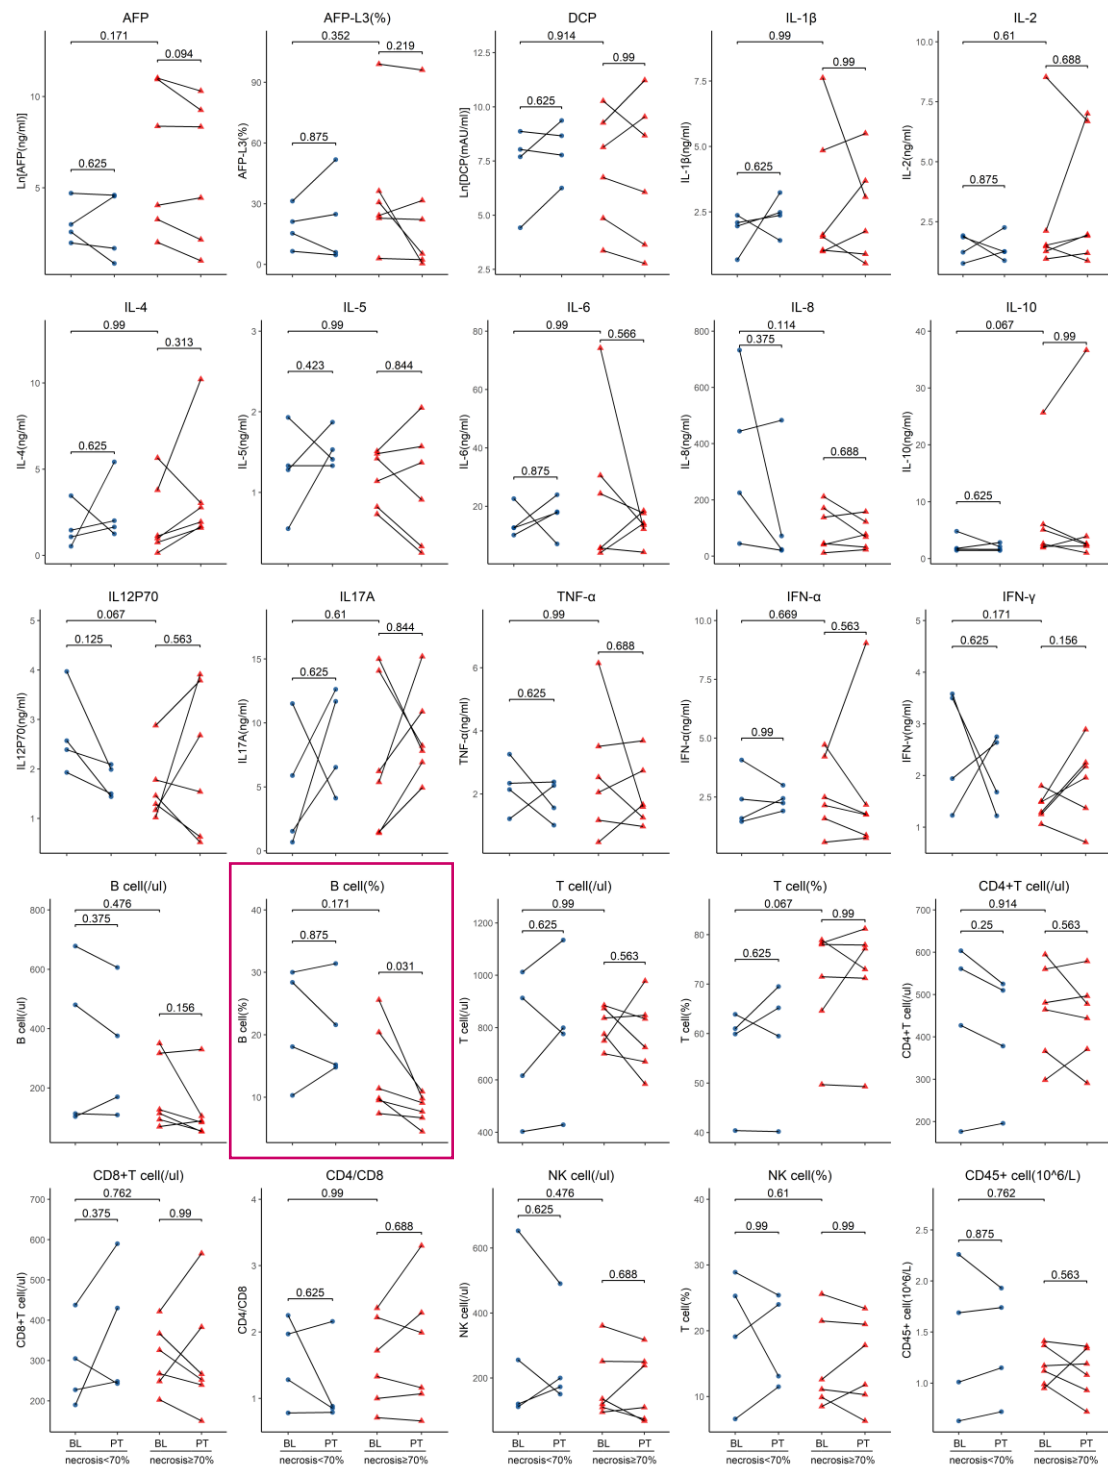

Supplement: js9-110-6647-s003.pdf [file js9-110-6647-s003.pdf]
